# Supplementary material
Source: PubMed Central journal article supplement (PMC3506734)
Supplement: tra0011-1205-SD3.pdf [file tra0011-1205-SD3.pdf]

Supplementary Table 1 (cont)

| Statistics for Histogram 7B        |     |         |              |         |         |         |
|------------------------------------|-----|---------|--------------|---------|---------|---------|
| Fcy fluorescence                   |     |         |              |         |         |         |
| Significantly different (p < 0.05) |     |         |              |         |         |         |
| - nocodazole                       |     |         | + nocodazole |         |         |         |
|                                    | Ap  | MED     | BL           | Ap      | MED     | BL      |
| - nocodazole                       | Ap  | 8.7E-06 | 0.0031       | 0.0004  | 0.3032  | 0.0001  |
|                                    | MED | -       | 3.5E-07      | 0.0122  | 0.0021  | 8.8E-06 |
|                                    | BL  | -       | -            | 9.2E-05 | 0.1716  | 0.0055  |
| + nocodazole                       | Ap  | -       | -            | 0.0001  | 9.0E-08 | -       |
|                                    | MED | -       | -            | -       | 0.0024  | -       |
|                                    | BL  | -       | -            | -       | -       | -       |

| Statistics for Histogram 7B        |     |        |              |         |        |         |
|------------------------------------|-----|--------|--------------|---------|--------|---------|
| pIgA fluorescence                  |     |        |              |         |        |         |
| Significantly different (p < 0.05) |     |        |              |         |        |         |
| - nocodazole                       |     |        | + nocodazole |         |        |         |
|                                    | Ap  | MED    | BL           | Ap      | MED    | BL      |
| - nocodazole                       | Ap  | 0.3124 | 0.0023       | 0.0001  | 0.0050 | 0.0007  |
|                                    | MED | -      | 0.0047       | 2.8E-05 | 0.0066 | 0.0002  |
|                                    | BL  | -      | -            | 0.0032  | 0.5060 | 2.9E-05 |
| + nocodazole                       | Ap  | -      | -            | -       | 0.0018 | 0.0003  |
|                                    | MED | -      | -            | -       | -      | 0.0008  |
|                                    | BL  | -      | -            | -       | -      | -       |

| Statistics for Supplementary Histogram 1A     |              |             |              |             |              |                   |              |
|-----------------------------------------------|--------------|-------------|--------------|-------------|--------------|-------------------|--------------|
| Colocalization with EEA1 (whole cell volumes) |              |             |              |             |              |                   |              |
| Significantly different (p < 0.05)            |              |             |              |             |              |                   |              |
|                                               |              | Fcy / EEA1  |              | pIgA / EEA1 |              | Fcy / pIgA / EEA1 |              |
|                                               |              | 5 min chase | 20 min chase | 5 min chase | 20 min chase | 5 min chase       | 20 min chase |
| Fcy / EEA1                                    | 5 min chase  | -           | 0.8448       | 0.0009      | 0.5126       | 0.0006            | 0.0433       |
|                                               | 20 min chase | -           | -            | 0.0082      | 0.7686       | 0.0061            | 0.1452       |
| pIgA / EEA1                                   | 5 min chase  | -           | -            | -           | 0.0005       | 0.5281            | 0.0008       |
|                                               | 20 min chase | -           | -            | -           | -            | 0.0006            | 0.0657       |
| Fcy / pIgA / EEA1                             | 5 min chase  | -           | -            | -           | -            | -                 | 0.0003       |
|                                               | 20 min chase | -           | -            | -           | -            | -                 | -            |

| Statistics for Supplementary Histogram 1C |              |              |              |             |              |             |              |             |              |             |              |             |              |             |              |             |              |             |              |                   |              |        |        |        |        |        |
|-------------------------------------------|--------------|--------------|--------------|-------------|--------------|-------------|--------------|-------------|--------------|-------------|--------------|-------------|--------------|-------------|--------------|-------------|--------------|-------------|--------------|-------------------|--------------|--------|--------|--------|--------|--------|
| Colocalization                            |              |              |              |             |              |             |              |             |              |             |              |             |              |             |              |             |              |             |              |                   |              |        |        |        |        |        |
| Significantly different (p < 0.05)        |              |              |              |             |              |             |              |             |              |             |              |             |              |             |              |             |              |             |              |                   |              |        |        |        |        |        |
|                                           |              | Fcy / EEA1   |              |             |              |             |              | pIgA / EEA1 |              |             |              |             |              | Fcy / pIgA  |              |             |              |             |              | Fcy / pIgA / EEA1 |              |        |        |        |        |        |
|                                           |              | MED          |              | BL          |              | MED         |              | BL          |              | MED         |              | BL          |              | MED         |              | BL          |              | MED         |              | BL                |              |        |        |        |        |        |
|                                           |              | 5 min chase  | 20 min chase | 5 min chase | 20 min chase | 5 min chase | 20 min chase | 5 min chase | 20 min chase | 5 min chase | 20 min chase | 5 min chase | 20 min chase | 5 min chase | 20 min chase | 5 min chase | 20 min chase | 5 min chase | 20 min chase | 5 min chase       | 20 min chase |        |        |        |        |        |
| Fcy / EEA1                                | Ap           | 5 min chase  | -            | 0.0804      | 0.5881       | 0.3765      | 0.0093       | 0.2059      | 0.0045       | 0.2333      | 0.0063       | 0.1007      | 0.0042       | 0.4749      | 0.0313       | 0.0351      | 0.0838       | 0.0617      | 0.0120       | 0.5678            | 0.0081       | 0.7811 | 0.0075 | 0.5886 | 0.0028 | 0.0128 |
|                                           |              | 20 min chase | -            | -           | 0.0300       | 0.4503      | 0.0012       | 0.0101      | 0.0016       | 0.7782      | 0.0011       | 0.8674      | 0.0016       | 0.0413      | 0.0027       | 0.7298      | 0.0065       | 0.7211      | 0.0012       | 0.1503            | 0.0013       | 0.1587 | 0.0012 | 0.3622 | 0.0006 | 0.0015 |
|                                           | MED          | 5 min chase  | -            | -           | -            | 0.1854      | 0.0079       | 0.3952      | 0.0029       | 0.1209      | 0.0031       | 0.0503      | 0.0027       | 0.7246      | 0.0378       | 0.0102      | 0.1252       | 0.0258      | 0.0996       | 0.2162            | 0.0045       | 0.4425 | 0.0056 | 0.3567 | 0.0016 | 0.0119 |
| pIgA / EEA1                               | Ap           | 5 min chase  | -            | -           | -            | 0.0081      | 0.0715       | 0.0075      | 0.6858       | 0.0062      | 0.4127       | 0.0073      | 0.1162       | 0.0227      | 0.2835       | 0.0411      | 0.3110       | 0.0113      | 0.6184       | 0.0108            | 0.5472       | 0.0103 | 0.8178 | 0.0052 | 0.0102 |        |
|                                           |              | 20 min chase | -            | -           | -            | -           | 0.1202       | 0.3596      | 0.0100       | 0.5900      | 0.0046       | 0.3360      | 0.1243       | 0.2456      | 0.0003       | 0.0425      | 0.0017       | 0.7918      | 0.0011       | 0.8581            | 0.0136       | 0.8047 | 0.0283 | 0.3064 | 0.7152 |        |
|                                           | BL           | 5 min chase  | -            | -           | -            | -           | -            | 0.0438      | 0.0513       | 0.0637      | 0.0188       | 0.0415      | 0.7225       | 0.3878      | 0.0040       | 0.8013      | 0.0105       | 0.1474      | 0.0650       | 0.0879            | 0.1632       | 0.0813 | 0.1586 | 0.0355 | 0.1719 |        |
| Fcy / pIgA                                | Ap           | 5 min chase  | -            | -           | -            | 0.0080      | 0.5481       | 0.0040      | 0.9575       | 0.0702      | 0.0321       | 0.0004      | 0.0019       | 0.0024      | 0.1690       | 0.0008      | 0.2427       | 0.0098      | 0.2642       | 0.0196            | 0.0282       | 0.0196 | 0.7225 | 0.1730 |        |        |
|                                           |              | 20 min chase | -            | -           | -            | -           | 0.0095       | 0.6895      | 0.0078       | 0.1118      | 0.0195       | 0.5667      | 0.0326       | 0.5692      | 0.0107       | 0.3807      | 0.0110       | 0.3462      | 0.0106       | 0.5662            | 0.0054       | 0.5662 | 0.0054 | 0.0120 |        |        |
|                                           | MED          | 5 min chase  | -            | -           | -            | -           | -            | 0.0047      | 0.4979       | 0.0085      | 0.5017       | 0.0137      | 0.8718       | 0.0048      | 0.1736       | 0.0054      | 0.1702       | 0.0052      | 0.3347       | 0.0025            | 0.0054       | 0.0054 | 0.0054 |        |        |        |
| Fcy / pIgA / EEA1                         | Ap           | 5 min chase  | -            | -           | -            | -           | -            | -           | -            | 0.0682      | 0.0277       | 0.0008      | 0.0021       | 0.0023      | 0.1549       | 0.0007      | 0.2057       | 0.0004      | 0.2190       | 0.0192            | 0.7395       | 0.1566 |        |        |        |        |
|                                           |              | 20 min chase | -            | -           | -            | -           | -            | -           | -            | 0.3081      | 0.0225       | 0.5551      | 0.0315       | 0.1501      | 0.0650       | 0.1114      | 0.1062       | 0.2993      | 0.0584       | 0.1627            |              |        |        |        |        |        |
|                                           | MED          | 5 min chase  | -            | -           | -            | -           | -            | -           | -            | -           | 0.0011       | 0.3071      | 0.0048       | 0.3098      | 0.0041       | 0.1146      | 0.0367       | 0.0974      | 0.0586       | 0.0360            | 0.3998       |        |        |        |        |        |
| Fcy / pIgA / EEA1                         | Ap           | 5 min chase  | -            | -           | -            | -           | -            | -           | -            | -           | 0.0018       | 0.9536      | 0.0605       | 0.0660      | 0.0005       | 0.9806      | 0.0005       | 0.2323      | 0.0002       | 0.0006            |              |        |        |        |        |        |
|                                           |              | 20 min chase | -            | -           | -            | -           | -            | -           | -            | -           | -            | 0.0076      | 0.0424       | 0.0126      | 0.0077       | 0.0851      | 0.0072       | 0.1024      | 0.0039       | 0.0711            |              |        |        |        |        |        |
|                                           | BL           | 5 min chase  | -            | -           | -            | -           | -            | -           | -            | -           | -            | 0.0027      | 0.1093       | 0.0032      | 0.1104       | 0.0031      | 0.2536       | 0.0014      | 0.0030       |                   |              |        |        |        |        |        |
| Fcy / pIgA / EEA1                         | Ap           | 5 min chase  | -            | -           | -            | -           | -            | -           | -            | -           | -            | 0.0014      | 0.5822       | 0.0147      | 0.5257       | 0.0310      | 0.1715       | 0.8982      |              |                   |              |        |        |        |        |        |
|                                           |              | 20 min chase | -            | -           | -            | -           | -            | -           | -            | -           | -            | 0.0014      | 0.8344       | 0.0013      | 0.8643       | 0.0003      | 0.0015       |             |              |                   |              |        |        |        |        |        |
|                                           | MED          | 5 min chase  | -            | -           | -            | -           | -            | -           | -            | -           | -            | 0.0111      | 0.9171       | 0.0279      | 0.2690       | 0.5222      |              |             |              |                   |              |        |        |        |        |        |
| Fcy / pIgA / EEA1                         | Ap           | 5 min chase  | -            | -           | -            | -           | -            | -           | -            | -           | -            | -           | -            | -           | -            | -           | -            | -           | -            | -                 | -            | -      | -      | -      |        |        |
|                                           |              | 20 min chase | -            | -           | -            | -           | -            | -           | -            | -           | -            | -           | -            | -           | -            | -           | -            | -           | -            | -                 | -            | -      | -      | -      |        |        |
|                                           | BL           | 5 min chase  | -            | -           | -            | -           | -            | -           | -            | -           | -            | -           | -            | -           | -            | -           | -            | -           | -            | -                 | -            | -      | -      | -      |        |        |
|                                           | 20 min chase | -            | -            | -           | -            | -           | -            | -           | -            | -           | -            | -           | -            | -           | -            | -           | -            | -           | -            | -                 | -            | -      | -      | -      |        |        |

| Statistics for Supplementary Histogram 2A |              |              |              |              |              |              |              |
|-------------------------------------------|--------------|--------------|--------------|--------------|--------------|--------------|--------------|
| Fcy / Rab7 colocalization                 |              |              |              |              |              |              |              |
| Significantly different (p < 0.05)        |              |              |              |              |              |              |              |
|                                           |              | MED          |              | BL           |              |              |              |
|                                           |              | 10 min chase | 30 min chase | 10 min chase | 30 min chase | 10 min chase | 30 min chase |
| Ap                                        | 10 min chase | -            | 0.5834       | 0.0948       | 0.3170       | 0.0214       | 0.2679       |
|                                           | 30 min chase | -            | -            | 0.1009       | 0.2057       | 0.0543       | 0.1745       |
| MED                                       | 10 min chase | -            | -            | -            | 0.5160       | 0.0699       | 0.6794       |
|                                           | 30 min chase | -            | -            | -            | -            | 0.1295       | 0.8700       |
| BL                                        | 10 min chase | -            | -            | -            | -            | -            | 0.2014       |
|                                           | 30 min chase | -            | -            | -            | -            | -            | -            |

| Statistics for Supplementary Histogram 2A |              |              |              |              |              |              |              |
|-------------------------------------------|--------------|--------------|--------------|--------------|--------------|--------------|--------------|
| Fcy / LAMP2 colocalization                |              |              |              |              |              |              |              |
| Significantly different (p < 0.05)        |              |              |              |              |              |              |              |
|                                           |              | MED          |              | BL           |              |              |              |
|                                           |              | 10 min chase | 30 min chase | 10 min chase | 30 min chase | 10 min chase | 30 min chase |
| Ap                                        | 10 min chase | -            | 0.3123       | 0.5820       | 0.1018       | 0.0081       | 0.0081       |
|                                           | 30 min chase | -            | -            | 0.2414       | 0.6321       | 0.0022       | 0.0022       |
| MED                                       | 10 min chase | -            | -            | -            | 0.1367       | 0.2070       | 0.2070       |
|                                           | 30 min chase | -            | -            | -            | -            | 0.0002       | 0.1367       |
| BL                                        | 10 min chase | -            | -            | -            | -            | -            | 0.0002       |
|                                           | 30 min chase | -            | -            | -            | -            | -            | -            |

| Statistics for Supplementary Histogram 2B |              |              |              |              |              |              |              |
|-------------------------------------------|--------------|--------------|--------------|--------------|--------------|--------------|--------------|
| pIgA / Rab7 colocalization                |              |              |              |              |              |              |              |
| Significantly different (p < 0.05)        |              |              |              |              |              |              |              |
|                                           |              | MED          |              | BL           |              |              |              |
|                                           |              | 10 min chase | 30 min chase | 10 min chase | 30 min chase | 10 min chase | 30 min chase |
| Ap                                        | 10 min chase | -            | 0.8360       | 0.1597       | 0.0420       | 0.0417       | 0.2378       |
|                                           | 30 min chase | -            | -            | 0.1217       | 0.0210       | 0.0242       | 0.2507       |
| MED                                       | 10 min chase | -            | -            | -            | 0.0824       | 0.8427       | -            |
|                                           | 30 min chase | -            | -            | -            | -            | 0.8703       | 0.5615       |
| BL                                        | 10 min chase | -            | -            | -            | -            | -            | 0.5956       |
|                                           | 30 min chase | -            | -            | -            | -            | -            | -            |

| Statistics for Supplementary Histogram 2B |              |              |              |              |              |              |              |
|-------------------------------------------|--------------|--------------|--------------|--------------|--------------|--------------|--------------|
| pIgA / LAMP2 colocalization               |              |              |              |              |              |              |              |
| Significantly different (p < 0.05)        |              |              |              |              |              |              |              |
|                                           |              | MED          |              | BL           |              |              |              |
|                                           |              | 10 min chase | 30 min chase | 10 min chase | 30 min chase | 10 min chase | 30 min chase |
| Ap                                        | 10 min chase | -            | 0.0160       | 0.6591       | 0.0997       | 0.3893       | 0.7661       |
|                                           | 30 min chase | -            | -            | 0.0003       | 0.3454       | 0.0002       | 0.0005       |
| MED                                       | 10 min chase | -            | -            | -            | 0.0257       | 0.4200       | 0.5087       |
|                                           | 30 min chase | -            | -            | -            | -            | 0.0163       | 0.0331       |
| BL                                        | 10 min chase | -            | -            | -            | -            | -            | 0.3074       |
|                                           | 30 min chase | -            | -            | -            | -            | -            | -            |
